# Supplementary figures and images for: Olive Leaf Tea Impact on Postprandial Glycemia: A Randomized Cross-Over Trial
Source: MDPI journal article supplement (doi:10.3390/foods12030528), 2023-01-24

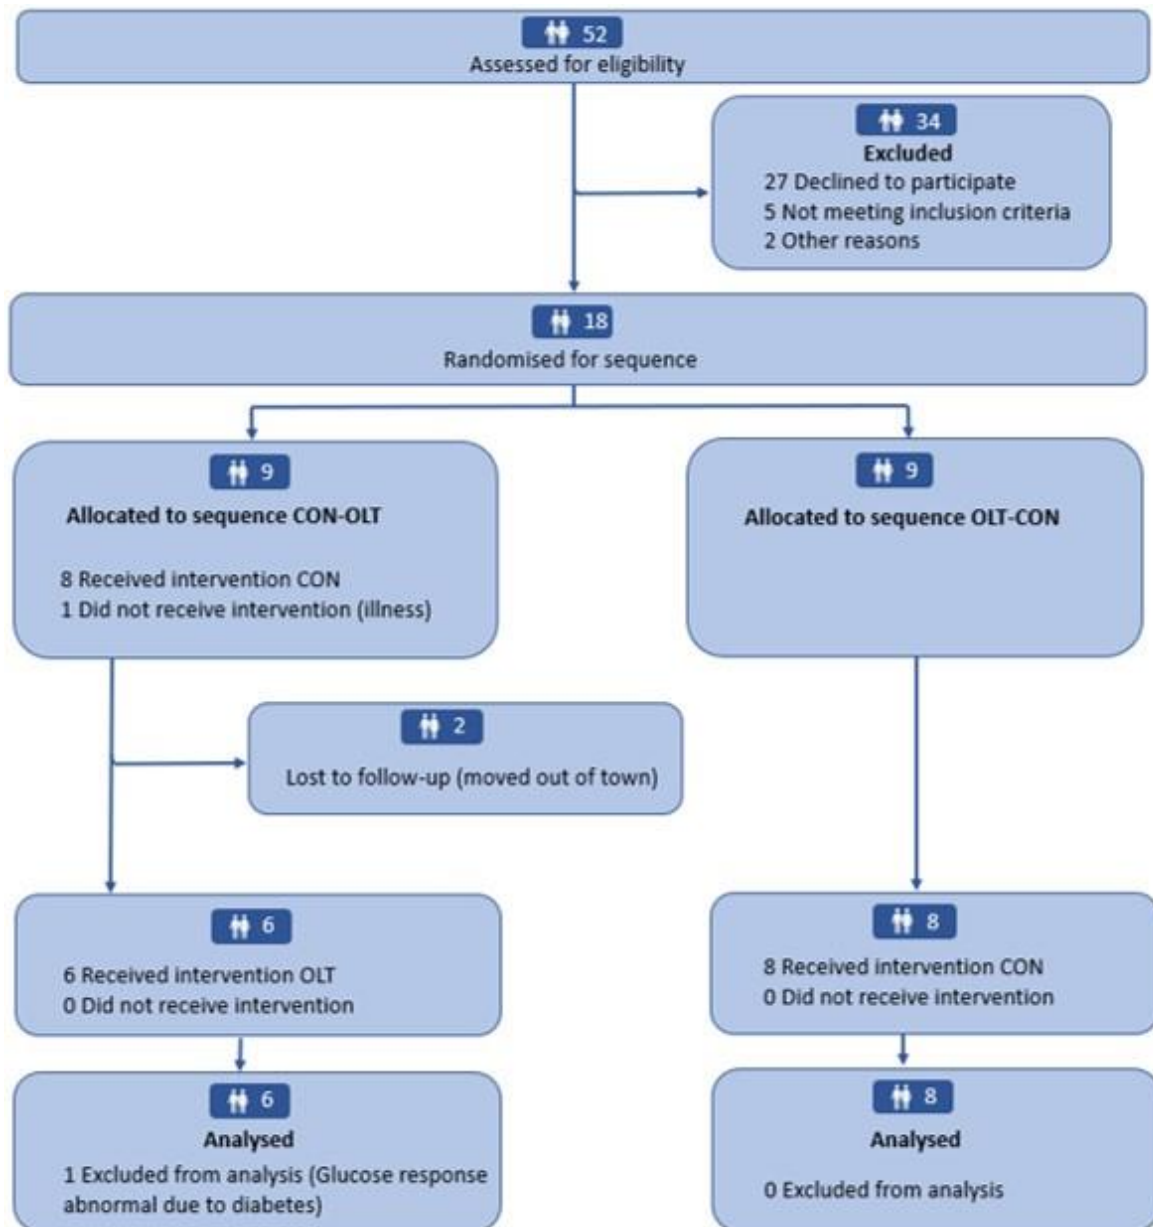

Figure S1. CONSORT flowchart of the trial flow.

Supplement: s1 [file s1]
